# Supplementary material for: The endothelial nitric oxide synthase/cyclic guanosine monophosphate/protein kinase G pathway activates primordial follicles
Source: Aging (Albany NY). 2020 Dec 3;13(1):1096–119. doi: 10.18632/aging.202235 (PMC7835019; doi:10.18632/aging.202235)
Supplement: Supplementary Figures [file aging-13-202235-s001.pdf]

## SUPPLEMENTARY FIGURES

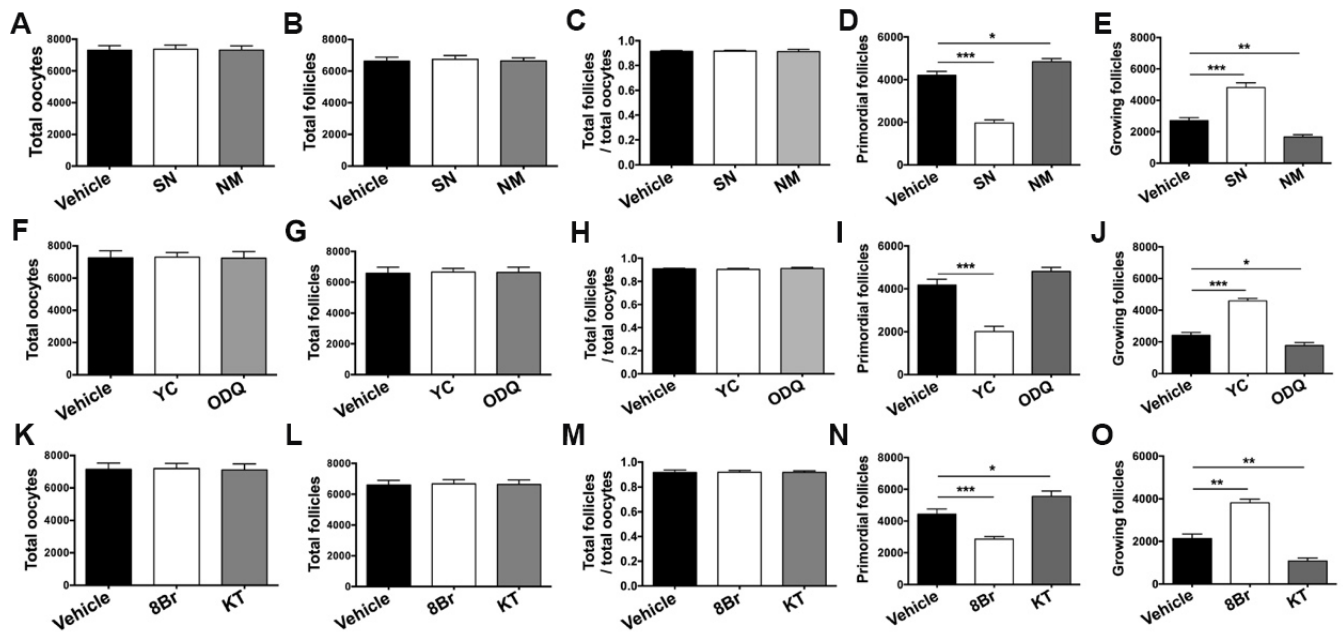

**Supplementary Figure 1. The numbers of oocytes, follicles, PFs and GFs after stimulating or inhibiting the eNOS/cGMP/PKG pathway.** (A) The total number of oocytes, (B) the total number of follicles, (C) the total number of follicles/the total number of oocytes, (D) the number of PFs and (E) the number of GFs were counted in ovaries treated with the vehicle, SN (100  $\mu$ M) or NM (1 mM) for six days (n=6). (F) The total number of oocytes, (G) the total number of follicles, (H) the total number of follicles/the total number of oocytes, (I) the number of PFs and (J) the number of GFs were counted in ovaries treated with the vehicle, YC (10  $\mu$ M) or ODQ (1  $\mu$ M) for six days (n=6). (K) The total number of oocytes, (L) the total number of follicles, (M) the total number of follicles/the total number of oocytes, (N) the number of PFs and (O) the number of GFs were counted in ovaries treated with the vehicle, 8Br (10  $\mu$ M) or KT (1  $\mu$ M) for six days (n=6). \*, \*\* and \*\*\* denote statistical significance at  $p < 0.05$ ,  $p < 0.01$  and  $p < 0.001$ , respectively.

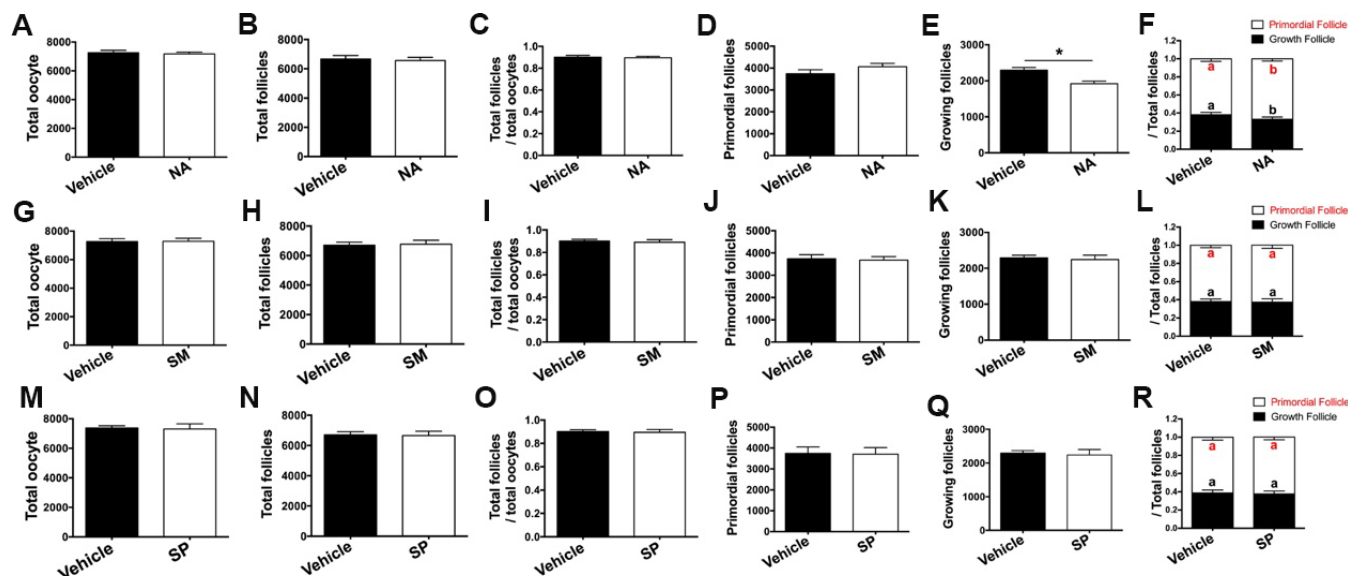

**Supplementary Figure 2. The numbers of oocytes, follicles, PFs and GFs, and the proportions of PFs and GFs after inhibiting the three NOS isoforms.** (A) The total number of oocytes, (B) the total number of follicles, (C) the total number of follicles/the total number of oocytes, (D) the number of PFs and (E) the number of GFs and (F) the numbers of PFs and GFs/the total number of follicles were counted in ovaries treated with the vehicle and eNOS inhibitor L-NAME (NA, 100  $\mu$ M) for six days (n=6). (G) The total number of oocytes, (H) the total number of follicles, (I) the total number of follicles/the total number of oocytes, (J) the number of PFs and (K) the number of GFs and (L) the numbers of PFs and GFs/the total number of follicles were counted in ovaries treated with the vehicle and iNOS inhibitor SMT (SM, 1 mM) for six days (n=6). (M) The total number of oocytes, (N) the total number of follicles, (O) the total number of follicles/the total number of oocytes, (P) the number of PFs and (Q) the number of GFs and (R) the numbers of PFs and GFs/the total number of follicles were counted in ovaries treated with the vehicle and nNOS inhibitor spermidine (SP, 10 mM) for six days (n=6). \* denotes statistical significance at  $p < 0.05$ . Different letters with the same color denote statistical significance at  $p < 0.05$  (Red letters represent the proportions of PFs, while black letters represent the proportions of GFs).

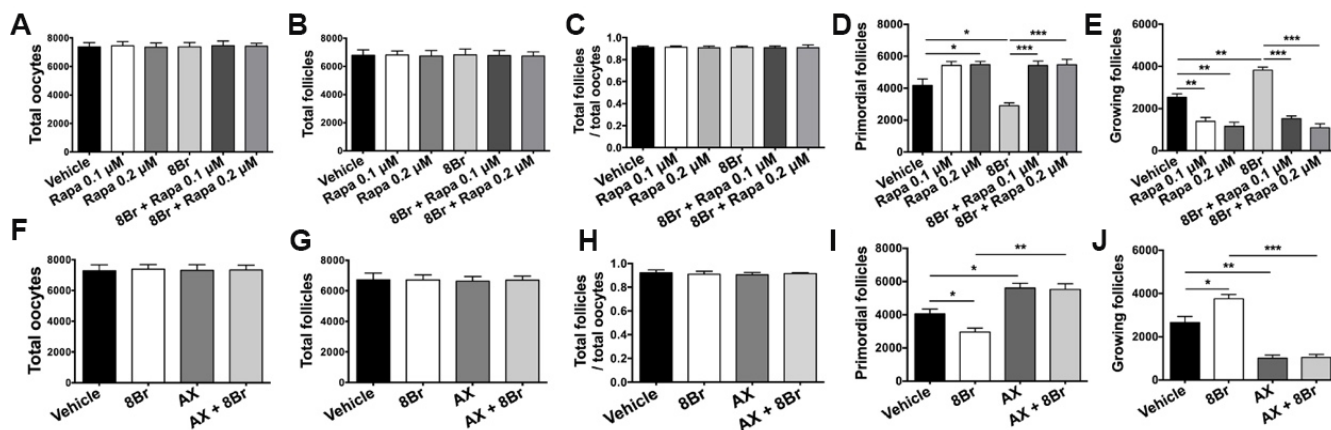

**Supplementary Figure 3. The numbers of oocytes, follicles, PFs and GFs after simultaneously inhibiting mTOR/KIT and activating eNOS/cGMP/PKG.** (A–E) Ovaries at 1 dpp were treated with the vehicle, 8Br (10  $\mu$ M), the mTOR inhibitor rapamycin (Rapa) or 8Br + Rapa for six days (n=6). (A) The total number of oocytes, (B) the total number of follicles, (C) the total number of follicles/the total number of oocytes, (D) the number of PFs and (E) the number of GFs were counted. (F–J) Ovaries at 1 dpp were treated with vehicle, 8Br (10  $\mu$ M), the KIT inhibitor Axitinib (AX, 5  $\mu$ M) or 8Br + AX for six days (n=6). (F) The total number of oocytes, (G) the total number of follicles, (H) the total number of follicles/the total number of oocytes, (I) the number of PFs and (J) the number of GFs were counted. \*, \*\*, and \*\*\* denote statistical significance at  $p < 0.05$ ,  $p < 0.01$  and  $p < 0.001$ , respectively.

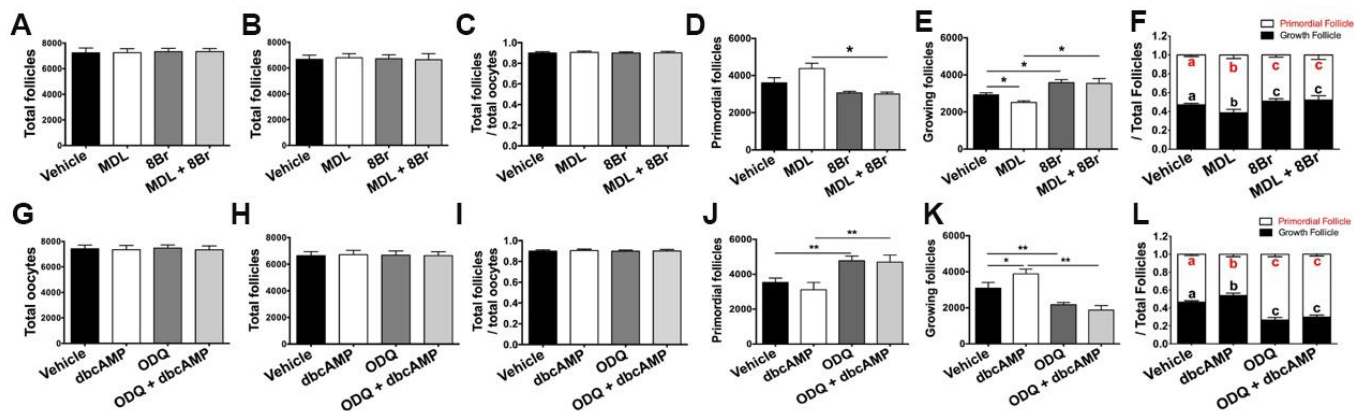

**Supplementary Figure 4. The numbers of oocytes, follicles, PFs and GFs, and the proportions of PFs and GFs after altering cGMP and cAMP signals.** (A–F) Ovaries at 1 dpp were treated with the vehicle, the adenylyl cyclase inhibitor MDL-12,330 (MDL, 5  $\mu$ M), 8Br (10  $\mu$ M), or MDL + 8Br for six days (n=6). (A) The total number of oocytes, (B) the total number of follicles, (C) the total number of follicles/the total number of oocytes, (D) the number of PFs, (E) the number of GFs and (F) the numbers of PFs and GFs/the total number of follicles were counted. (G–L) Ovaries at 1 dpp were treated with the vehicle, ODQ (1  $\mu$ M), the cAMP analog dbcAMP (10  $\mu$ M), or ODQ + dbcAMP for six days (n=6). (G) The total number of oocytes, (H) the total number of follicles, (I) the total number of follicles/the total number of oocytes, (J) the number of PFs, (K) the number of GFs and (L) the numbers of PFs and GFs/the total number of follicles were counted. \* and \*\* denote statistical significance at  $p < 0.01$  and  $p < 0.001$ , respectively. Different letters with the same color denote statistical significance at  $p < 0.05$  (Red letters represent the proportions of PFs, while black letters represent the proportions of GFs).
